# Supplementary material for: MiRNA-Mediated Subpathway Identification and Network Module Analysis to Reveal Prognostic Markers in Human Pancreatic Cancer
Source: Front Genet. 2020 Dec 9;11:606940. doi: 10.3389/fgene.2020.606940 (PMC7756031; doi:10.3389/fgene.2020.606940)
Supplement: Supplementary Table 9 — An exhaustive survival analysis for module M9. [file Table_9.XLSX]

## Sheet: Table S8
Table S8. An exhaustive survival analysis for module M8
OptimalFeature	Pvalue	NumLowGroup	NumHighGroup	Class
GAPDH	0.0106	31	32	single gene
Features	Pvalue	NumLowGroup	NumHighGroup	Class
Module M8	0.0287	31	32	module
GAPDH	0.0106	31	32	single gene
TPI1	0.0242	31	32	single gene
ALDOA	0.0774	31	32	single gene
_GAPDH_TPI1	0.045	31	32	combination
_GAPDH_ALDOA	0.0287	31	32	combination
_TPI1_ALDOA	0.117	31	32	combination
_GAPDH_TPI1_ALDOA	0.0287	31	32	combination
